# Supplementary material
Source: publisher site journal article supplement (https://www.spandidos-publications.com/8474/downloadSupplementary)

Figure S1. ROC curve analysis for predicting T2D remission. ROC curves illustrate the diagnostic performance of clinical parameters, including age, body composition metrics, and glycemic control. The Youden index was used to determine the optimal cut-off values for each parameter. The detailed statistical values are as follows: Age (AUC=0.6676; Youden index=0.3307; sensitivity=0.4923; specificity=0.8384), weight (AUC=0.6440; Youden index=0.3488; sensitivity=0.6840; specificity=0.6648), BMI (AUC=0.5380; Youden index=0.2025; sensitivity=0.5914; specificity=0.6112), HbA1c (AUC=0.7053, Youden index=0.4131; sensitivity=0.6889; specificity=0.7243), duration of T2D treatment (AUC=0.6138; Youden index=0.2828; sensitivity=0.8636; specificity=0.4191), body fat percentage (AUC=0.7202; Youden index=0.4363; sensitivity=0.7272; specificity=0.7092), muscle mass (AUC=0.7356; Youden index=0.4868; sensitivity=0.7529; specificity=0.7339), and skeletal muscle mass (AUC=0.7342; Youden index=0.5126; sensitivity=0.7820; specificity=0.7306). ROC, receiver operating characteristic; T2D, type 2 diabetes; AUC, area under the curve; BMI, body mass index.

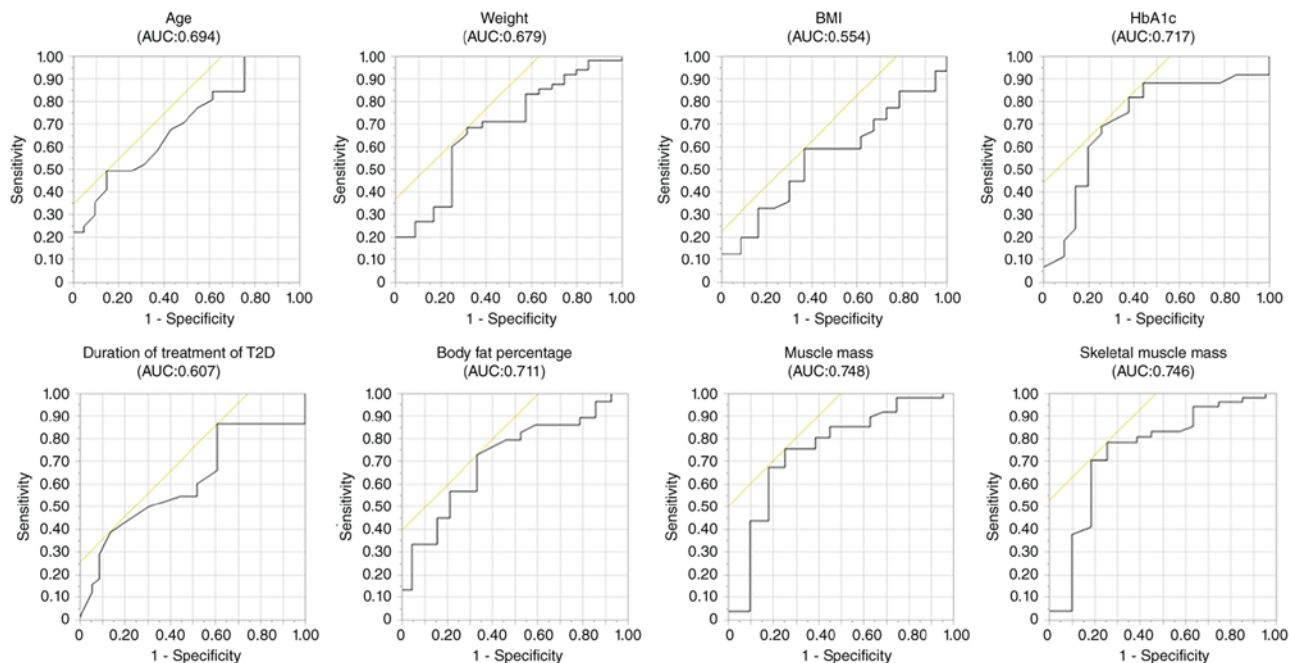

Supplement: Supplementary file 1 [file downloadSupplementary]
